# Supplementary material for: Nanonet-structured poly(m-phenylene isophthalamide)–polyurethane membranes with enhanced thermostability and wettability for high power lithium ion batteries
Source: Royal Society of Chemistry journal article supplement (doi:10.1039/c5ra09325b), 2015-01-01
Supplement: c5ra09325b1.pdf [file c5ra09325b1.pdf]

## **Electronic supplement information (ESI)**

### **Nanonet-structured poly(m-phenylene isophthalamide)- polyurethane membranes with enhanced thermostability and wettability for high power lithium ion batteries**

Ke Xiao,<sup>‡a</sup> Yunyun Zhai,<sup>‡ab</sup> Jianyong Yu<sup>c</sup> and Bin Ding<sup>\*ac</sup>

<sup>a</sup> State Key Laboratory for Modification of Chemical Fibers and Polymer Materials,  
College of Materials Science and Engineering, Donghua University, Shanghai 201620,  
China. E-mail: binding@dhu.edu.cn (B. Ding)

<sup>b</sup> College of Biological, Chemical Sciences and Engineering, Jiaxing University,  
Jiaxing 314001, China

<sup>c</sup> College of Textiles, Donghua University, Shanghai 201620, China

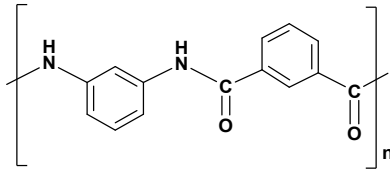

**Fig. S1** Chemical structure of PMIA.

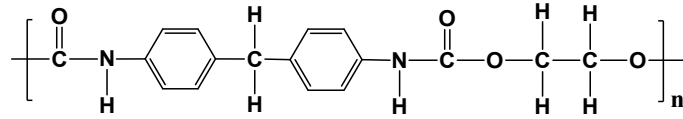

**Fig. S2** Chemical structure of PU.

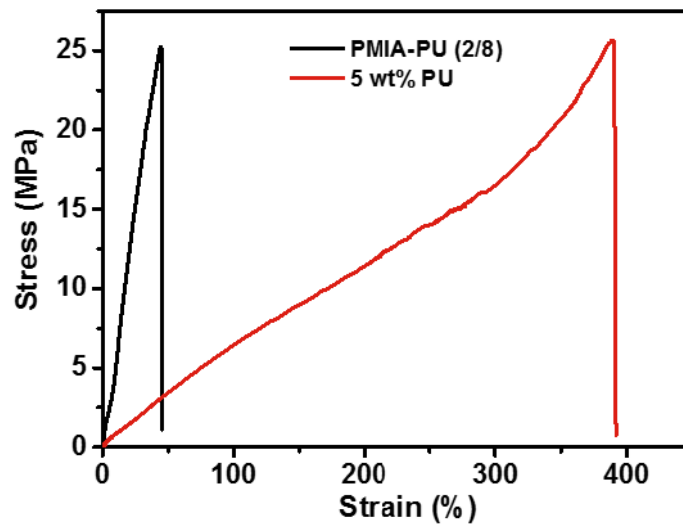

**Fig. S3** Stress-strain curves of PMIA-PU based membranes with weight ratio of 2/8 and 5 wt% PU membranes.
